# Supplementary material for: Non-destructive sub-surface inspection of multi-layer wind turbine blade coatings by mid-infrared Optical Coherence Tomography
Source: Copernicus journal article supplement (doi:10.5194/wes-2025-237), 2025-12-04
Supplement: Supplementary file [file wes-2025-237-RC2-supplement.pdf]

## **wes-2025-237 Review:**

### **Confidential Comments to the Editor:**

Thank you for the opportunity to review the Manuscript wes-2025-237 entitled " **Non-destructive sub-surface inspection of multi-layer wind turbine blade coatings by mid-infrared Optical Coherence Tomography**" for the Journal of **Wind Energy Science**.

To the best of my knowledge, I have thoroughly reviewed the manuscript, and I would recommend in **revise the manuscript with major comments** based on my review.

Thanks again for providing the opportunity to contribute the review support to maintain the quality standard of **Wind Energy Science** Journal.

I look forward to contributing more review support, so please share any additional manuscripts within my area of expertise. Thank you!

### **Comments to the Author:**

As reviewer of the Manuscript wes-2025-237 entitled " **Non-destructive sub-surface inspection of multi-layer wind turbine blade coatings by mid-infrared Optical Coherence Tomography**", I have thoroughly reviewed the manuscript, and I would recommend addressing the below comments to make the study more wholistic nature to appreciate the NDI of multi-layer wind turbine blade coatings by MIR OCT Technique:

1. Under Abstract section, there should be executive summary of the quantitative conclusions of the proposed research. The abstract should be rephrased to make it more wholistic of the complete study on the manuscript.
2. Considering the inspection depth upto two layers, what structural advantages can be accomplished as initially is quoting that the reducing the quantity of waste and thereby cost of production. Please add justification for the proposed study?
3. What is the capability of the described NDI techniques application on field blades compared to conventional inspection techniques.
4. What is the threshold capability of inspection depth for the mentioned MIR OCT technique.
5. Apart from the introducing the application of MIR OCT technique to wind blades from other applications, what are the extended research capabilities addressed in the proposed manuscript?

I hope my critique helps the authors to improve their work and find useful in this review. Thank you!
